# Supplementary material for: The Conformational Change of the L3 Loop Affects the Structural Changes in the Substrate Binding Pocket Entrance of β-Glucosidase
Source: MDPI journal article supplement (doi:10.3390/molecules28237807), 2023-11-27
Supplement: s1 [file s1]

# Supplementary Data

**The conformational change of the L3 loop affects the structural changes in the substrate binding pocket entrance of  $\beta$ -glucosidase**

**Ki Hyun Nam\***

College of General Education, Kookmin University, Seoul 02707, Republic of Korea

\* Correspondence: [structure@kookmin.ac.kr](mailto:structure@kookmin.ac.kr)

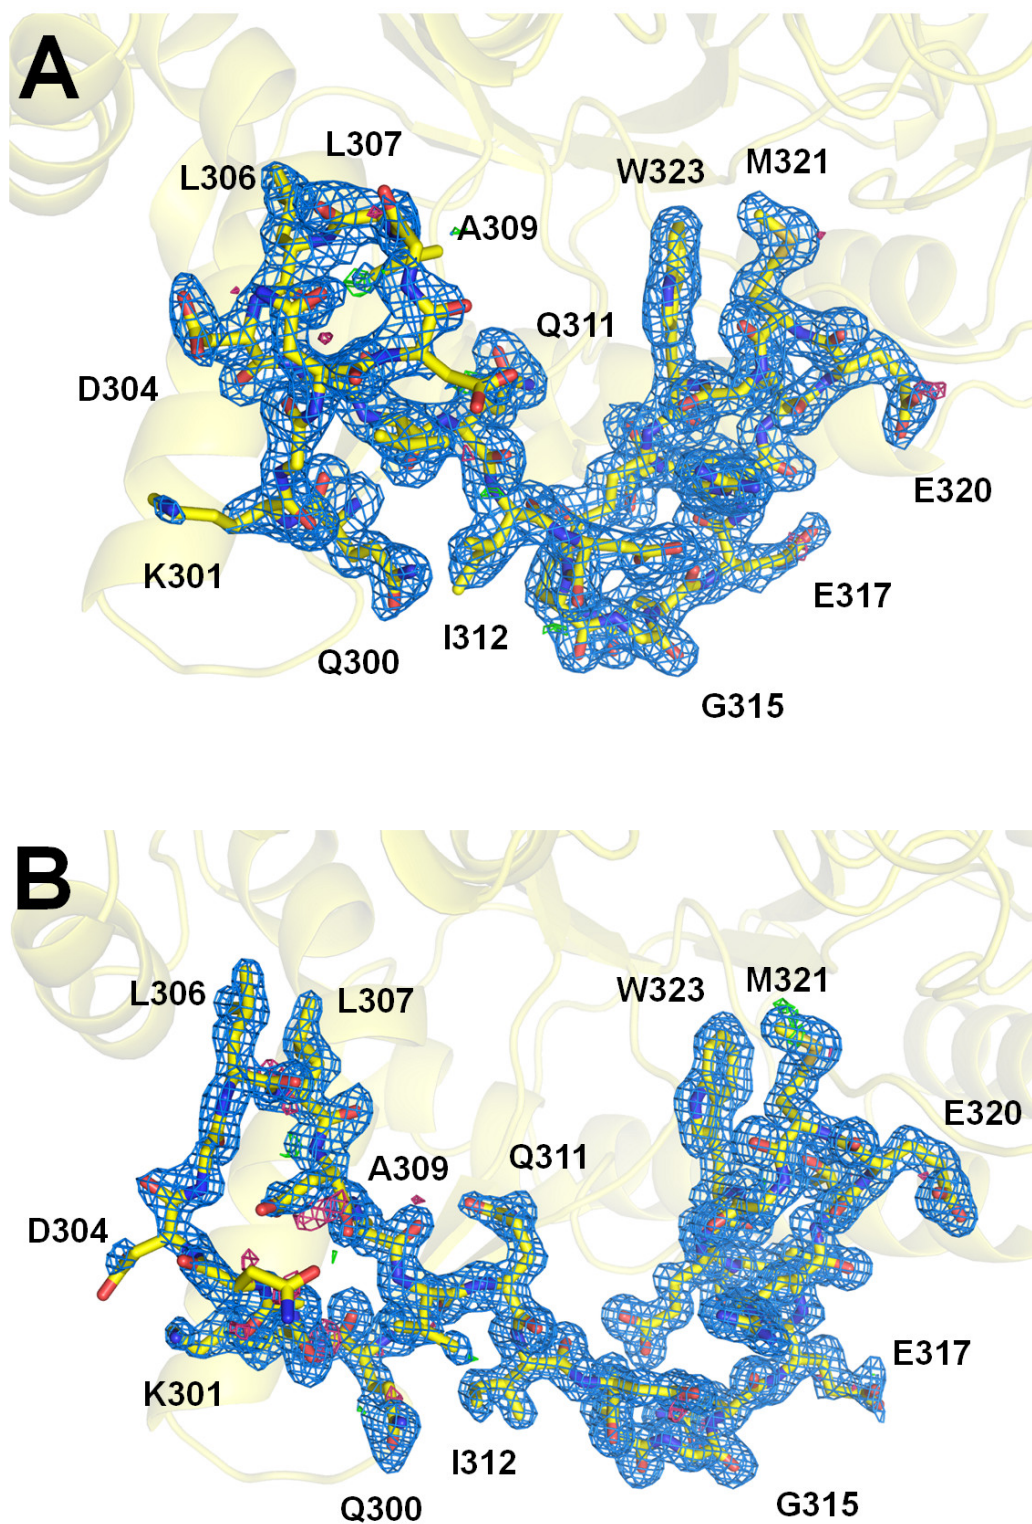

**Supplementary Figure S1.** 2mFo-Fc ( $1\sigma$ , blue mesh) and Fo-Fc ( $3\sigma$ , green mesh;  $-3\sigma$ , red mesh) electron density map of (A) folded L3 loop (Data I, chain A) and (B) straight L3 loop (Data III, chain A) of Tsabgl.

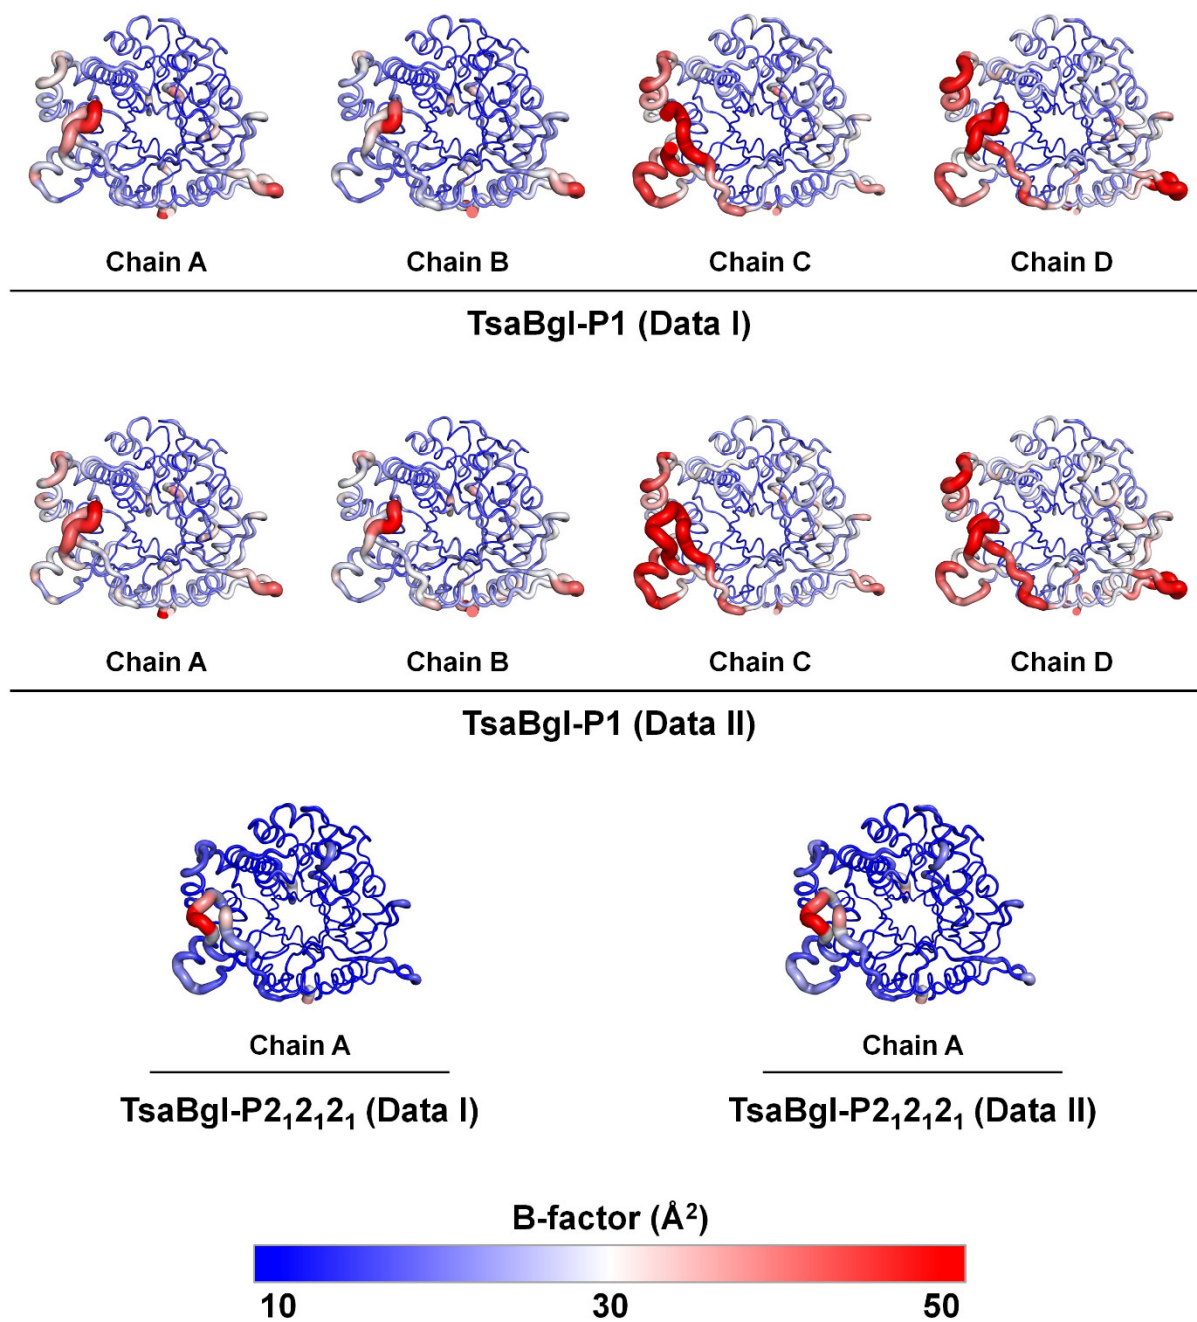

**Supplementary Figure S2.** B-factor putty representation of TsabG1 molecules from the two crystals form datasets, P1 and P2<sub>1</sub>2<sub>1</sub>2<sub>1</sub>.

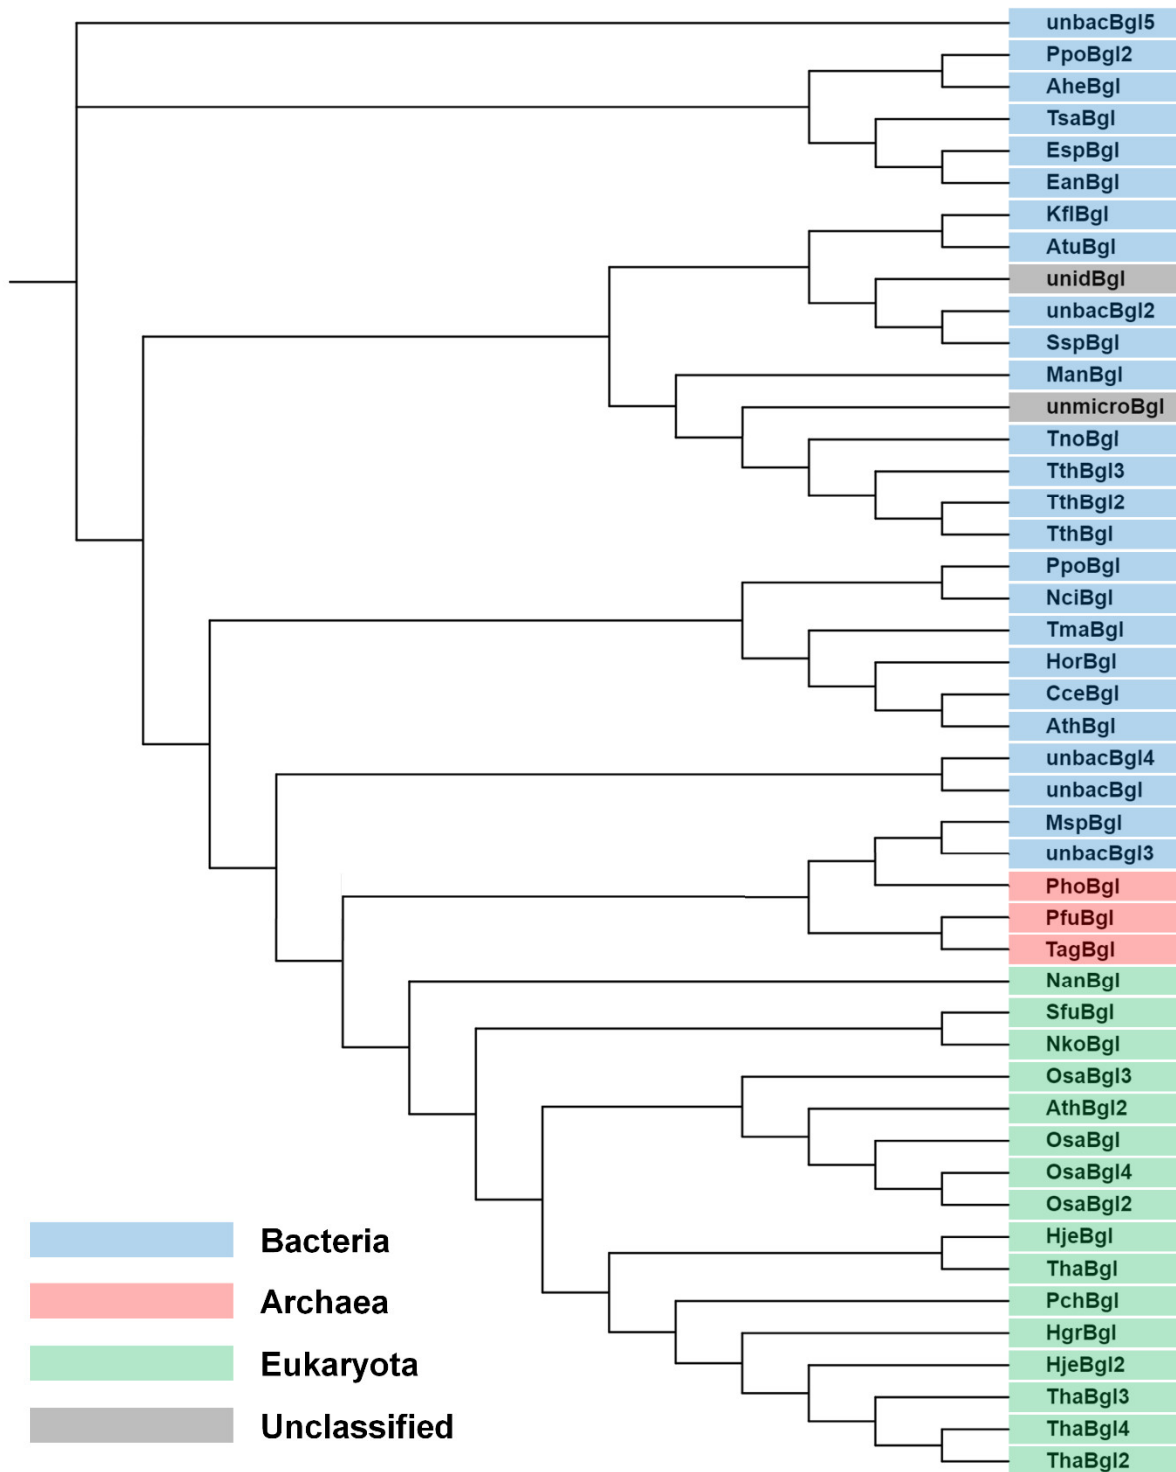

**Supplementary Figure S3.** Phylogenetic tree of Bgl protein from *Thermoanaerobacterium saccharolyticum* (TsaBgl, I3VXG7), *Pyrococcus furiosus* (PfuBgl, E7FHY4), *Pyrococcus horikoshii* (PhoBgl, O58104), *Thermosphaera aggregans* (TagBgl, Q9YGA8), *Acetivibrio thermocellus* (AthBgl, P26208), *Agrobacterium tumefaciens* (AtuBgl, A0A2I4PGZ0), *Alicyclobacillus herbarius* (AheBgl, A0A8I3B065), *Clostridium cellulovorans* (CceBgl, Q53EH2), *Exiguobacterium antarcticum* (EanBgl, K0A8J9), *Exiguobacterium* sp. (EspBgl,

C4L1S4), *Halothermothrix orenii* (HorBgl, B8CYA8), *Kribbella flavida* (KflBgl, D2PL27), *Microbacterium* sp.(MspBgl, L0ELG0), *Micrococcus antarcticus* (ManBgl, B9V8P5), *Niallia circulans* (NciBgl, Q03506), *Paenibacillus polymyxa* (PpoBgl, P22073), *Paenibacillus polymyxa* (PpoBgl2, P22505), *Streptomyces* sp. (SspBgl, Q59976), *Thermotoga maritima* (TmaBgl, Q08638), *Thermus nonproteolyticus* (TnoBgl, Q9L794), *Thermus thermophilus* (TthBgl, Q53W75), *Thermus thermophilus* (TthBgl2, Q8GEB3), *Thermus thermophiles* (TthBgl3, Q9RA61), uncultured bacterium (unbacBgl, A0A0F7KKB7), uncultured bacterium (unbacBgl2, A0A1L3HS62), uncultured bacterium (unbacBgl3, A0A4D6T7S3), uncultured bacterium (unbacBgl4, A0A5B9BHU3), uncultured bacterium (unbacBgl5, Q0GMU3), *Arabidopsis thaliana* (AthBgl2, A0A654G6E3), *Humicola grisea* var. *thermoidea* (HgrBgl, O93784), *Nannochloris* (NanBgl, A0A452CSM4), *Neotermes koshunensis* (NkoBgl, Q8T0W7), *Oryza sativa* subsp. *japonica* (OsaBgl, Q8L7J2), *Oryza sativa* subsp. *indica* (OsaBgl2, B8AVF0), *Oryza sativa* subsp. *japonica* (OsaBgl3, Q7XSK0), *Oryza sativa* subsp. *japonica* (OsaBgl4, Q75I93), *Phanerodontia chrysosporium* (PchBgl, Q25BW5), *Spodoptera frugiperda* (SfrBgl, O61594), *Trichoderma harzianum* (ThaBgl, A0A0F9XM91), *Trichoderma harzianum* (ThaBgl2, A0A0F9ZQA8), *Trichoderma harzianum* (ThaBgl3, A3FPG4), *Trichoderma harzianum* (ThaBgl4, A0A2T4AR08), *Hypocrea jecorina* (HjeBgl, G0RIF5), *Hypocrea jecorina* (HjeBgl2, O93785), *Trifolium repens* (TreBgl, P26205), uncultured microorganism (unmicroBgl, A0A1E1FFN6), unidentified (unidBgl, A0A2I2LGB3). Phylogenetic tree data was generated with Clustal Omega [1] and visualized with Interactive Tree Of Life (iTOL) v5 [2].



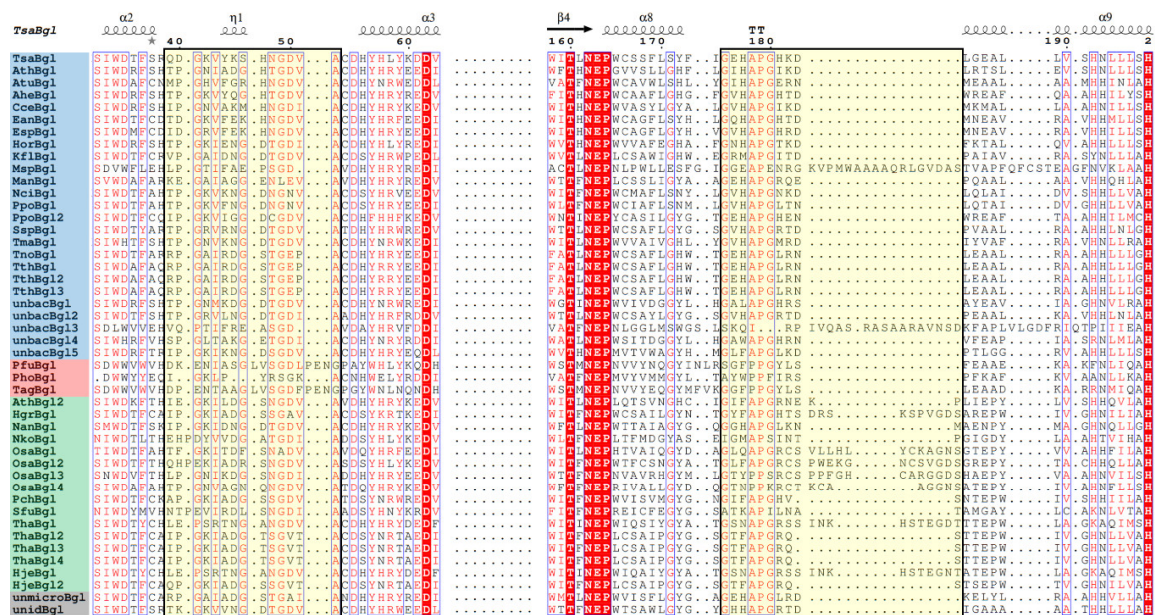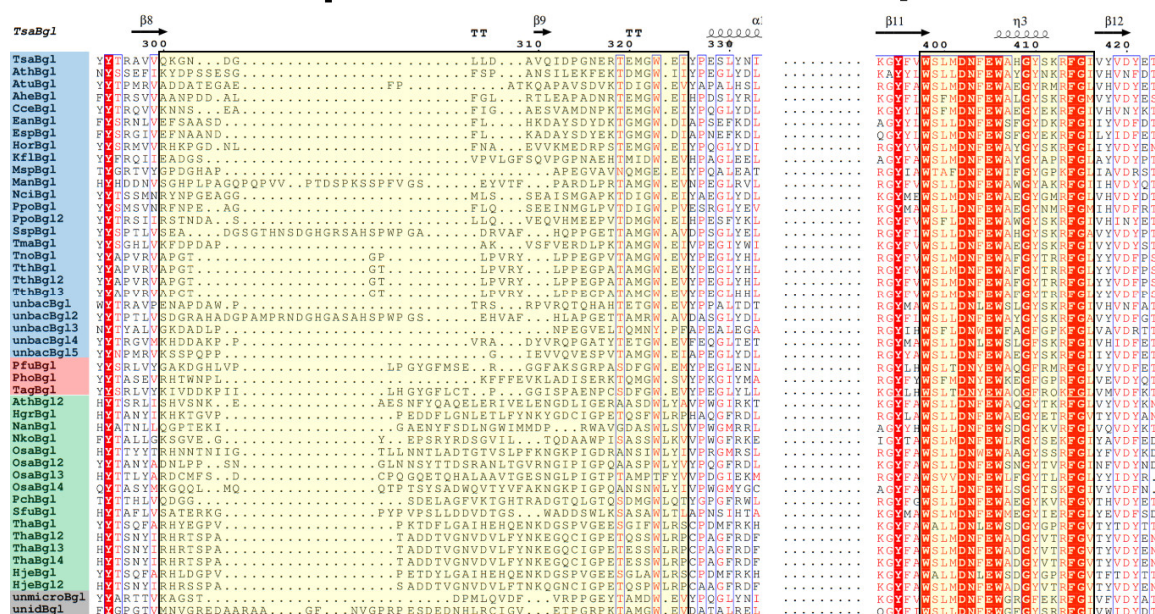

■ Bacteria
 ■ Archaea
 ■ Eukaryota
 ■ Unclassified

**Supplementary Figure S4.** Structure-based sequence alignment of  $\beta$ -glucosidase from *Thermoanaerobacterium saccharolyticum* (TsaBgl, UniProt code: I3VXG7), *Pyrococcus furiosus* (PfuBgl, E7FHY4), *Pyrococcus horikoshii* (PhoBgl, O58104), *Thermosphaera aggregans* (TagBgl, Q9YGA8), *Acetivibrio thermocellus* (AthBgl, P26208), *Agrobacterium tumefaciens* (AtuBgl, A0A214PGZ0), *Alicyclobacillus herbarius* (AheBgl, A0A813B065), *Clostridium cellulovorans* (CceBgl, Q53EH2), *Exiguobacterium antarcticum* (EanBgl, K0A8J9), *Exiguobacterium* sp. (EspBgl, C4L1S4), *Halothermothrix orenii* (HorBgl, B8CYA8), *Kribbella*

*flavida* (KflBgl, D2PL27), *Microbacterium* sp.(MspBgl, L0ELG0), *Micrococcus antarcticus* (ManBgl, B9V8P5), *Niallia circulans* (NciBgl, Q03506), *Paenibacillus polymyxa* (PpoBgl, P22073), *Paenibacillus polymyxa* (PpoBgl2, P22505), *Streptomyces* sp. (SspBgl, Q59976), *Thermotoga maritima* (TmaBgl, Q08638), *Thermus nonproteolyticus* (TnoBgl, Q9L794), *Thermus thermophilus* (TthBgl, Q53W75), *Thermus thermophilus* (TthBgl2, Q8GEB3), *Thermus thermophiles* (TthBgl3, Q9RA61), uncultured bacterium (unbacBgl, A0A0F7KKB7), uncultured bacterium (unbacBgl2, A0A1L3HS62), uncultured bacterium (unbacBgl3, A0A4D6T7S3), uncultured bacterium (unbacBgl4, A0A5B9BHU3), uncultured bacterium (unbacBgl5, Q0GMU3), *Arabidopsis thaliana* (AthBgl2, A0A654G6E3), *Humicola grisea* var. *thermoidea* (HgrBgl, O93784), *Nannochloris* (NanBgl, A0A452CSM4), *Neotermes koshunensis* (NkoBgl, Q8T0W7), *Oryza sativa* subsp. *japonica* (OsaBgl, Q8L7J2), *Oryza sativa* subsp. *indica* (OsaBgl2, B8AVF0), *Oryza sativa* subsp. *japonica* (OsaBgl3, Q7XSK0), *Oryza sativa* subsp. *japonica* (OsaBgl4, Q75I93), *Phanerodontia chrysosporium* (PchBgl, Q25BW5), *Spodoptera frugiperda* (SfrBgl, O61594), *Trichoderma harzianum* (ThaBgl, A0A0F9XM91), *Trichoderma harzianum* (ThaBgl2, A0A0F9ZQA8), *Trichoderma harzianum* (ThaBgl3, A3FPG4), *Trichoderma harzianum* (ThaBgl4, A0A2T4AR08), *Hypocrea jecorina* (HjeBgl, G0RIF5), *Hypocrea jecorina* (HjeBgl2, O93785), uncultured microorganism (unmicroBgl, A0A1E1FFN6), and unidentified (unidBgl, A0A2I2LGB3).



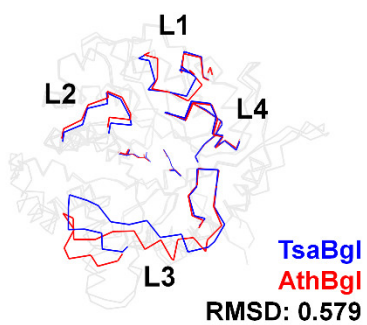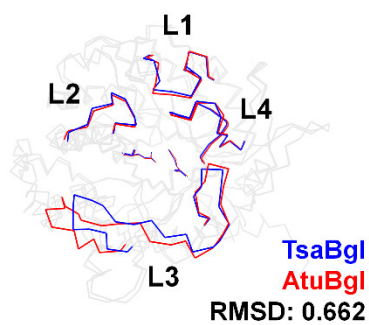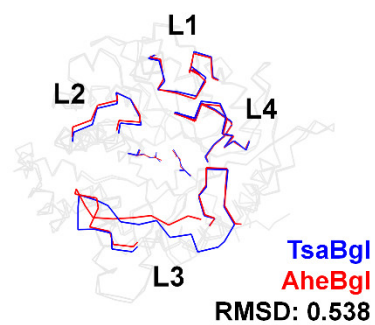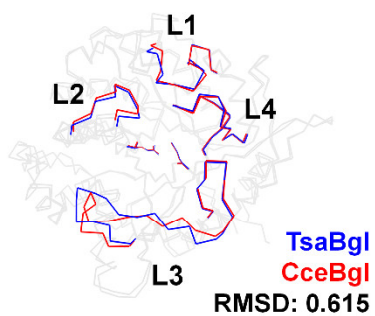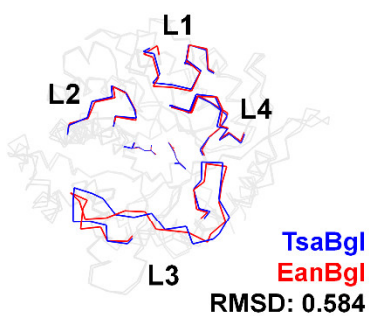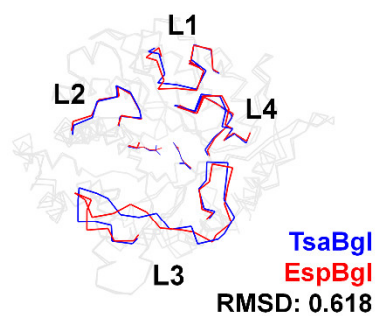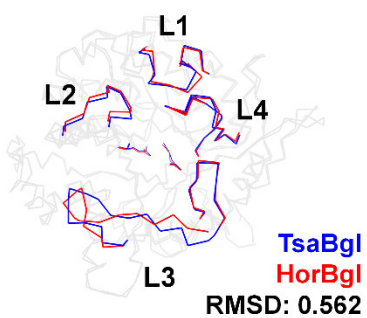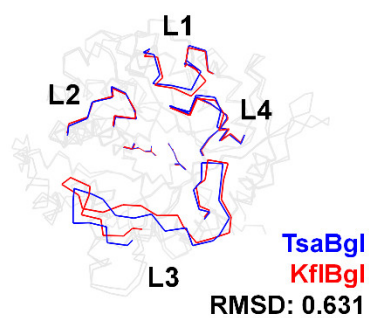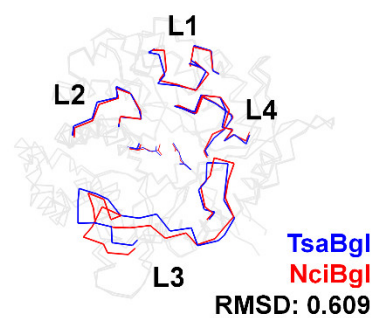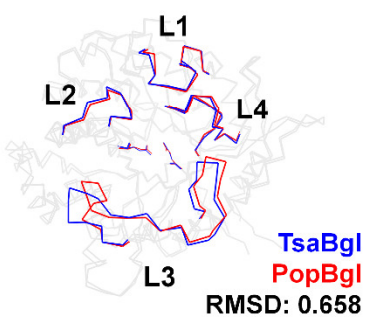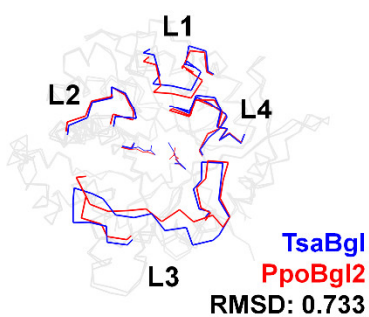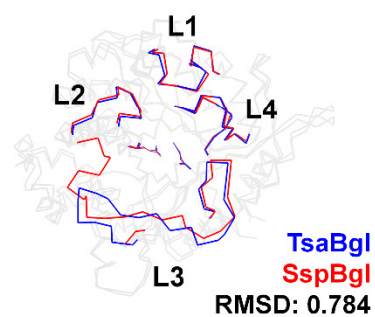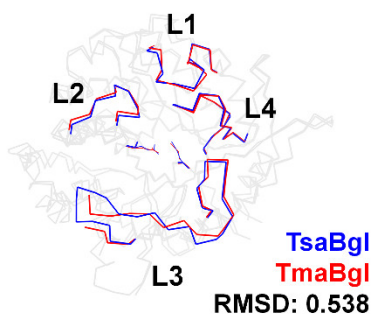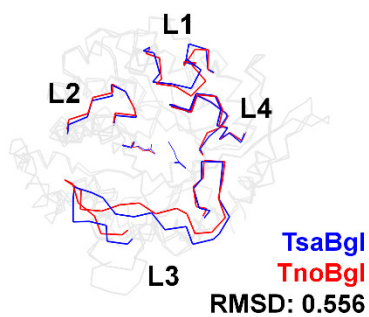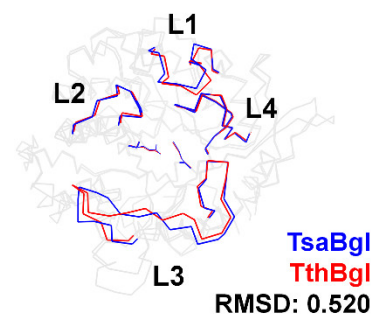



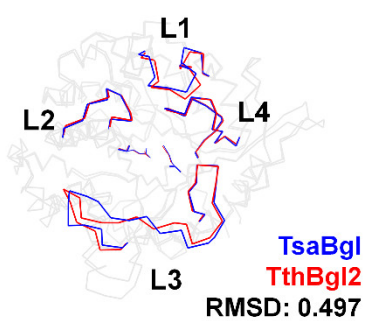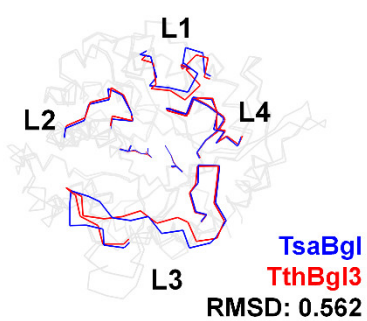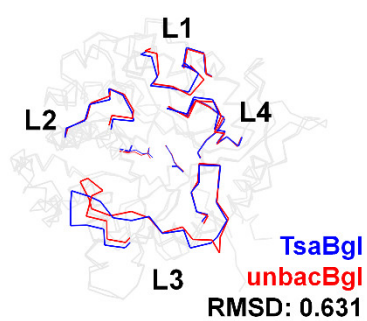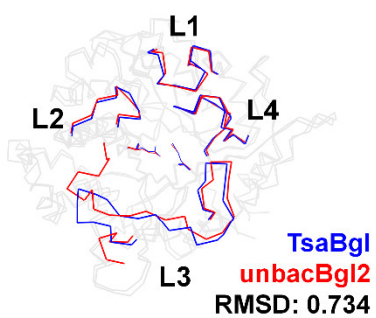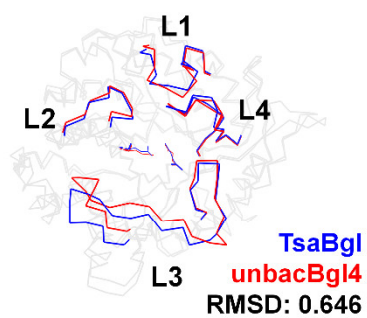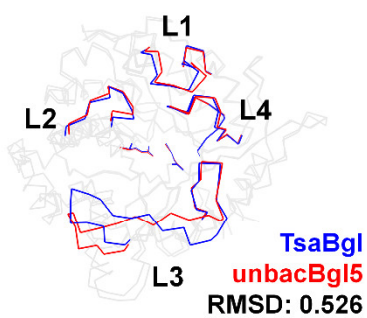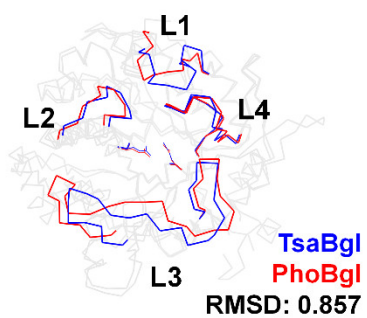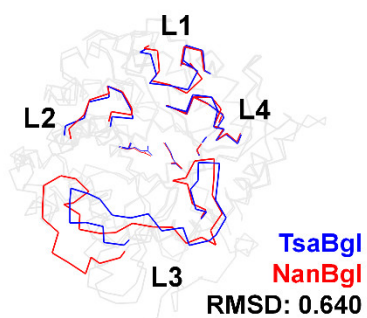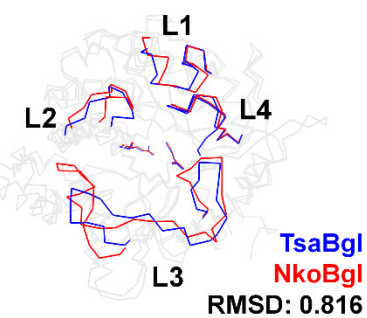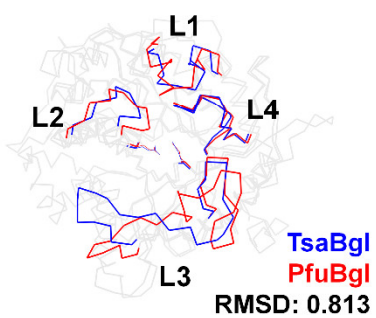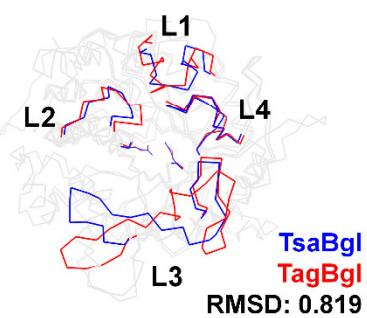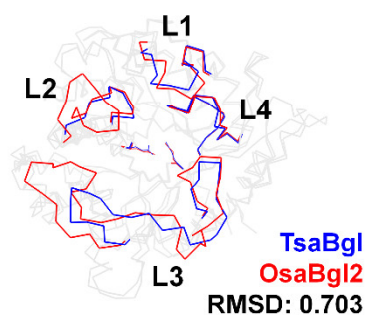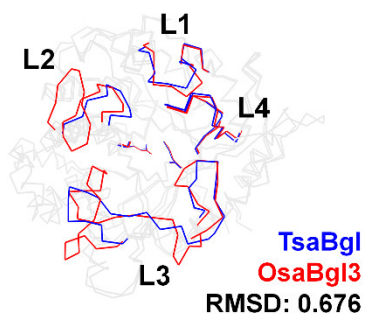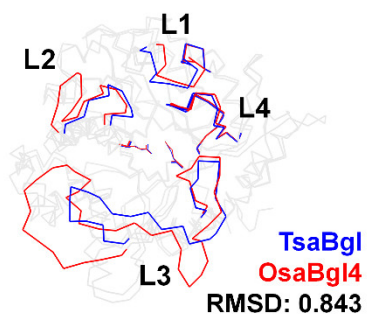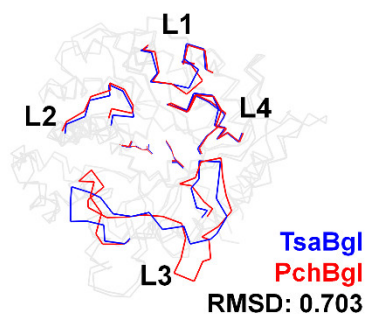

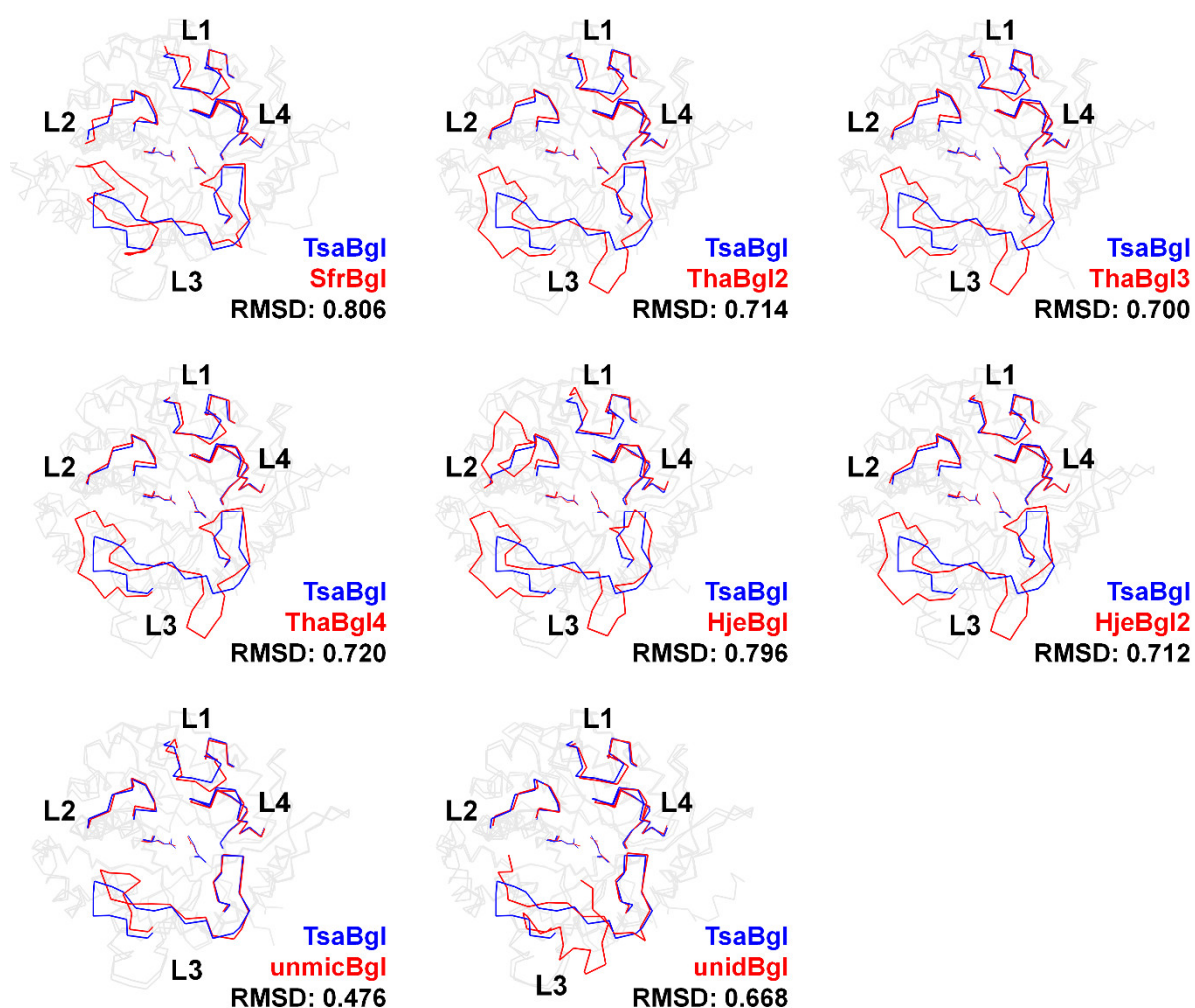

**Supplementary Figure S5.** Structural comparison of the loop structures on TsaBgl substrate binding pockets with TagBgl (PDB code: 1QVB), AthBgl (5OGZ), AtuBgl (6RJK), AheBgl (6YN7), CceBgl (3AHX), EanBgl(5DT5), EspBgl (6WIU), HorBgl (3TA9), KflBgl (6M6L), NciBgl (1QOX), PpoBgl (1BGA), PpoBgl2 (2JIE), SspBgl (1GNX), TmaBgl (1OD0), TnoBgl (1NP2), TthBgl (1UG6), TthBgl2 (4BCE), TthBgl3 (3ZJK), unbacBgl (5GNX), unbacBgl2 (7BBS), unbacBgl4 (6JFP), unbacBgl5 (3CMJ), PhoBgl (1VFF), NanBgl (5YJ7), NkoBgl (3AHZ), PfuBgl (3APG), TsaBgl (7E5J), OsaBgl2 (3PTK), OsaBgl3 (7D6A), OsaBgl4 (2RGL), PchBgl (2E3Z), SfrBgl (5CG0), ThaBgl2 (5JBK), ThaBgl3 (5BWF), ThaBgl4 (6EFU), HjeBgl (6KHT), HjeBgl2 (3AHY), unmicBgl (5XGZ) and unidBgl (5WKA).

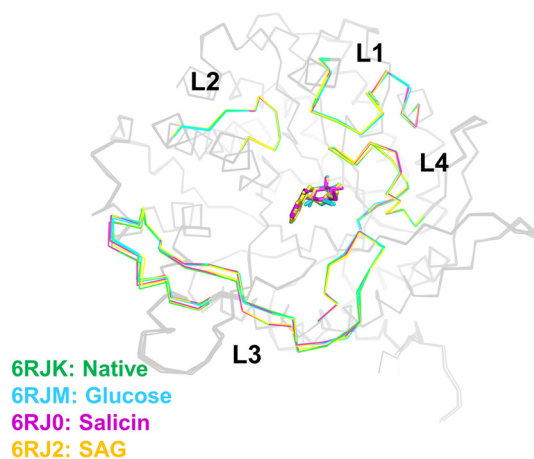

**AtuBgl**

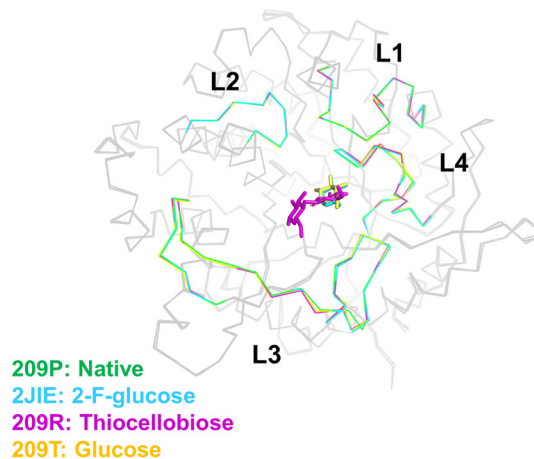

**PpoBgl2**

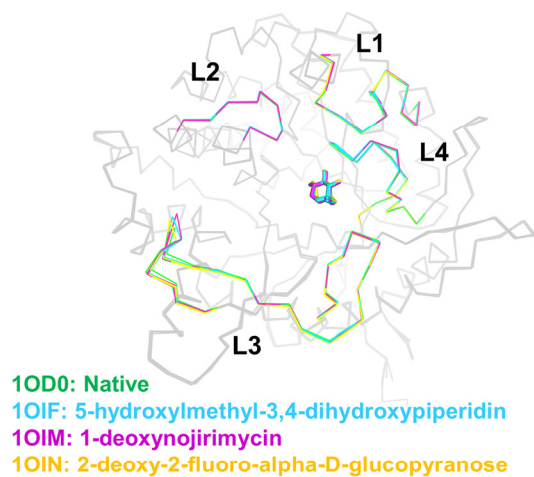

**TmaBgl**

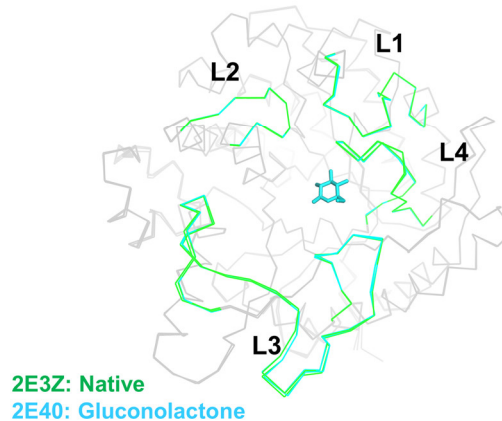

**PchBgl**

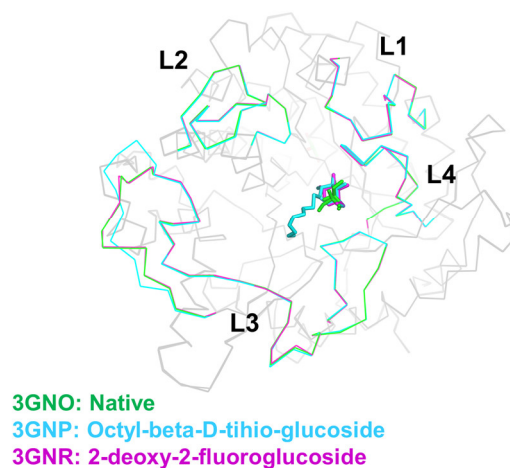

**OsaBgl**

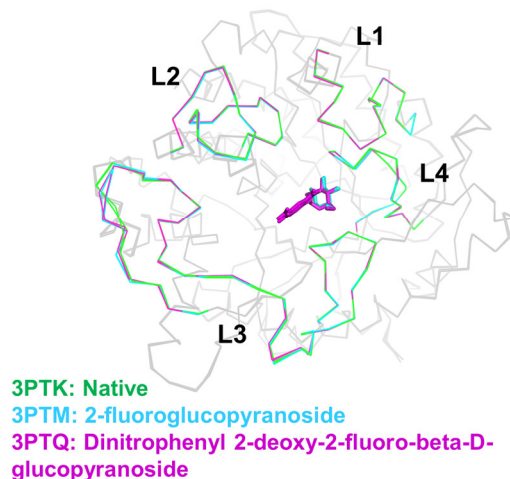

**OsaBgl2**

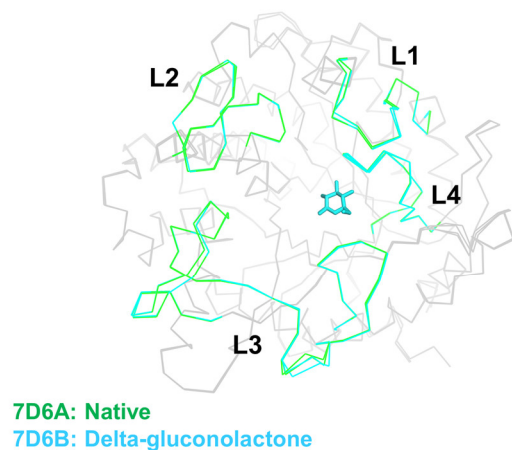

### OsaBgl3

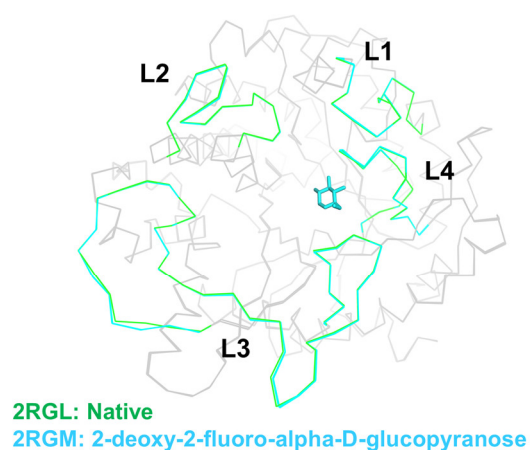

### OsaBgl4

**Supplementary Figure S6.** Superimposition of native and ligand-bound Bgl for AtuBgl, ProBgl2, TmaBgl, PchBgl, OsaBgl, OsaBgl2, OsaBgl3, and OsaBgl4. The PDB codes and Bgl bound ligand were shown superimposition structures. The detailed information of the Bgl structures were shown in Table S3.



**Table S1.** Analysis of temperature factor ( $\text{\AA}^2$ ) of TsaBgl and its four loops.

| Data     | Chain | L1    | L2    | L3    | L4    | Whole |
|----------|-------|-------|-------|-------|-------|-------|
| Data I   | A     | 17.31 | 19.26 | 27.64 | 15.36 | 20.94 |
|          | B     | 15.79 | 17.94 | 26.16 | 14.64 | 20.27 |
|          | C     | 22.62 | 24.01 | 37.74 | 17.23 | 22.73 |
|          | D     | 25.81 | 25.83 | 38.91 | 19.92 | 24.01 |
| Data I   | A     | 19.79 | 21.06 | 30.04 | 17.31 | 22.91 |
|          | B     | 17.55 | 18.55 | 28.79 | 16.37 | 22.19 |
|          | C     | 25.74 | 25.01 | 43.46 | 19.89 | 24.97 |
|          | D     | 27.55 | 27.43 | 39.42 | 21.48 | 25.56 |
| Data III | A     | 12.77 | 13.66 | 21.13 | 8.77  | 13.42 |
| Data IV  | A     | 13.82 | 14.31 | 23.47 | 9.40  | 12.30 |

**Table S2.** Sequence information of Bgl used in this study.

| Archaea  |                                              |                                                          |            |                                                                                           |
|----------|----------------------------------------------|----------------------------------------------------------|------------|-------------------------------------------------------------------------------------------|
|          | Protein Name                                 | Organism                                                 | UniProt    | PDB                                                                                       |
| PfuBgl   | $\beta$ -glucosidase / $\beta$ -rutinosidase | <i>Pyrococcus furiosus</i>                               | Q51723     | 3APG, 3WDP, 3WQ8                                                                          |
| PhoBgl   | alkyl $\beta$ -glucosidase                   | <i>Pyrococcus horikoshii</i> OT3                         | O58104     | 1VFF                                                                                      |
| TagBgl   | $\beta$ -glucosidase                         | <i>Thermosphaera aggregans</i> M11TL                     | Q9YGA8     | 1QVB                                                                                      |
| Bacteria |                                              |                                                          |            |                                                                                           |
|          | Protein Name                                 | Organism                                                 | UniProt    | PDB                                                                                       |
| AthBgl   | exo- $\beta$ -glucosidase 1A                 | <i>Acetivibrio thermocellus</i> ATCC 27405               | P26208     | 5OGZ                                                                                      |
| AtuBgl   | SghA                                         | <i>Agrobacterium tumefaciens</i> A6                      | A0A2I4PGZ0 | 6RJK, 6RJM, 6RJO, 6RK2                                                                    |
| AheBgl   | $\beta$ -glucosidase                         | <i>Alicyclobacillus herbarius</i>                        | A0A8I3B065 | 6YN7                                                                                      |
| CceBgl   | $\beta$ -glucosidase A                       | <i>Clostridium cellulovorans</i>                         | Q53EH2     | 3AHX                                                                                      |
| EanBgl   | $\beta$ -glucosidase                         | <i>Exiguobacterium antarcticum</i> B7 Eab7               | K0A8J9     | 5DT5, 5DT7                                                                                |
| EspBgl   | EAT1b_2183                                   | <i>Exiguobacterium</i> sp. AT1b                          | C4L1S4     | 6WIU                                                                                      |
| HorBgl   | $\beta$ -glucosidase A                       | <i>Halothermothrix orenii</i> H 168                      | B8CYA8     | 3TA9, 4PTV, 4PTW, 4PTX                                                                    |
| KflBgl   | $\beta$ -glucosidase                         | <i>Kribbella flavida</i> DSM 17836                       | D2PL27     | 6M6L, 6M6M                                                                                |
| MspBgl   | $\beta$ -glycosidase                         | <i>Microbacterium</i> sp. Gsoil167                       | L0ELG0     | 4R27                                                                                      |
| ManBgl   | $\beta$ -glucosidase                         | <i>Micrococcus antarcticus</i>                           | B9V8P5     | 3W53                                                                                      |
| NciBgl   | $\beta$ -glucosidase                         | <i>Niallia circulans</i> subsp. <i>alkalophilus</i>      | Q03506     | 1QOX                                                                                      |
| PpoBgl   | $\beta$ -glucosidase A                       | <i>Paenibacillus polymyxa</i>                            | P22073     | 1BGA, 1BGG, 1E4I, 1TR1, 1UYQ, 6QWI, 6R4K                                                  |
| PpoBgl2  | $\beta$ -glucosidase B                       | <i>Paenibacillus polymyxa</i>                            | P22505     | 2JIE, 2O9P, 2O9R, 2O9T, 2Z1S                                                              |
| SspBgl   | $\beta$ -glucosidase                         | <i>Streptomyces</i> sp. QM-B814                          | Q59976     | 1GNX, 1GON                                                                                |
| TsaBgl   | $\beta$ -glucosidase                         | <i>Thermoanaerobacterium saccharolyticum</i> JW/SL-YS485 | I3VXG7     | 7E5J                                                                                      |
| TmaBgl   | $\beta$ -glucosidase A                       | <i>Thermotoga maritima</i> MSB8                          | Q08638     | 1OD0, 1OIF, 1OIM, 1OIN, 1UZ1, 1W3J, 2CBU, 2CBV, 2CES, 2CET, 2J75, 2J77, 2J78, 2J79, 2J7B, |

|                  |                                                 |                                                                                             |                |                                                                                                 |
|------------------|-------------------------------------------------|---------------------------------------------------------------------------------------------|----------------|-------------------------------------------------------------------------------------------------|
|                  |                                                 |                                                                                             |                | 2J7C, 2J7D, 2J7E,<br>2J7F, 2J7G, 2J7H,<br>2JAL, 2VRJ, 2WBG,<br>2WC3, 2WC4, 5N6S,<br>5N6T, 5OSS, |
| TnoBgl           | $\beta$ -glycosidase                            | <i>Thermus nonproteolyticus</i><br>HG102                                                    | Q9L794         | 1NP2                                                                                            |
| TthBgl           | $\beta$ -glycosidase / $\beta$ -<br>glucosidase | <i>Thermus thermophilus</i> HB8                                                             | Q53W75         | 1UG6                                                                                            |
| TthBgl2          | $\beta$ -glycosidase / $\beta$ -<br>glucosidase | <i>Thermus thermophilus</i>                                                                 | Q8GEB3         | 4BCE                                                                                            |
| TthBgl3          | $\beta$ -glycosidase                            | <i>Thermus thermophilus</i><br>TH125                                                        | Q9RA61         | 3ZJK                                                                                            |
| unbacBgl         | $\beta$ -glucosidase                            | uncultured bacterium                                                                        | A0A0F7KKB7     | 5GNX, 5GNY, 5GNZ,<br>7BBS                                                                       |
| unbacBgl2        | $\beta$ -glucosidase<br>Bg10                    | uncultured bacterium                                                                        | A0A1L3HS62     | 7BBS                                                                                            |
| unbacBgl3        | $\beta$ -glucosidase                            | uncultured bacterium                                                                        | A0A4D6T7S3     | 6IER                                                                                            |
| unbacBgl4        | $\beta$ -glucosidase<br>Bgl15                   | uncultured bacterium                                                                        | A0A5B9BHU3     | 6JFP                                                                                            |
| unbacBgl5        | $\beta$ -glucosidase / $\beta$ -<br>glycosidase | uncultured bacterium                                                                        | Q0GMU3         | 3CMJ, 3FIY, 3FIZ,<br>3FJO, 4HZ6, 4HZ7,<br>4HZ8                                                  |
| <b>Eukaryota</b> |                                                 |                                                                                             |                |                                                                                                 |
|                  | <b>Protein Name</b>                             | <b>Organism</b>                                                                             | <b>UniProt</b> | <b>PDB</b>                                                                                      |
| AthBgl2          | $\beta$ -glucosidase                            | <i>Arabidopsis thaliana</i>                                                                 | A0A654G6E3     | 7F3A                                                                                            |
| HgrBgl           | $\beta$ -glucosidase                            | <i>Humicola grisea</i> var.<br><i>thermoidea</i> IFO9854 /<br><i>Humicola insolens</i> RP86 | O93784         | 4MDO, 4MDP                                                                                      |
| NanBgl           | $\beta$ -glucosidase<br>BGLN1                   | <i>Nannochloris</i>                                                                         | A0A452CSM4     | 5YJ7                                                                                            |
| NkoBgl           | $\beta$ -glucosidase                            | <i>Neotermes koshunensis</i>                                                                | Q8T0W7         | 3AHZ, 3AI0, 3VIF,<br>3VIG, 3VIH, 3VII,<br>3VIJ, 3VIK, 3VIL,<br>3VIM, 3VIN, 3VIO,<br>3VIP        |
| OsaBgl           | $\beta$ -glucosidase                            | <i>Oryza sativa Japonica</i><br>Group                                                       | Q8L7J2         | 3GNO, 3GNP,<br>3GNR, 3WBA, 3WBE                                                                 |
| OsaBgl2          | $\beta$ -glucosidase                            | <i>Oryza sativa Japonica</i><br>Group                                                       | B8AVF0         | 3PTK, 3PTM, 3PTQ                                                                                |
| OsaBgl3          | monolignol $\beta$ -<br>glucosidase             | <i>Oryza sativa Japonica</i><br>Group                                                       | Q7XSK0         | 7D6A, 7D6B                                                                                      |

|                     |                                            |                                                  |                |                                                                                                                                                         |
|---------------------|--------------------------------------------|--------------------------------------------------|----------------|---------------------------------------------------------------------------------------------------------------------------------------------------------|
| OsaBgl4             | $\beta$ -glucosidase                       | <i>Oryza sativa Japonica</i><br>Group            | Q75I93         | 2RGL, 2RGM, 3AHT,<br>3AHV, 3F4V, 3F5J,<br>3F5K, 3F5L, 3SCN,<br>3SCO, 3SCP, 3SCQ,<br>3SCR, 3SCS, 3SCT,<br>3SCU, 3SCV, 3SCW,<br>4QLJ, 4QLK, 4QLL,<br>7BZM |
| PchBgl              | $\beta$ -glucosidase                       | <i>Phanerochaete</i><br><i>chrysosporium</i> K-3 | Q25BW5         | 2E3Z, 2E40                                                                                                                                              |
| SfrBgl              | $\beta$ -glycosidase                       | <i>Spodoptera frugiperda</i>                     | O61594         | 5CG0                                                                                                                                                    |
| ThaBgl              | $\beta$ -glucosidase<br>ThBgl2             | <i>Trichoderma harzianum</i>                     | A0A0F9XM91     | 5JBO                                                                                                                                                    |
| ThaBgl2             | $\beta$ -1,4-glucosidase                   | <i>Trichoderma harzianum</i> T7                  | A0A0F9ZQA8     | 5JBK                                                                                                                                                    |
| ThaBgl3             | Beta-1,4-<br>glucosidase                   | <i>Trichoderma harzianum</i>                     | A3FPG4         | 5BWF                                                                                                                                                    |
| ThaBgl4             | Glycoside<br>hydrolase family 1<br>protein | <i>Trichoderma harzianum</i><br>CBS 226.95       | A0A2T4AR08     | 6EFU                                                                                                                                                    |
| HjeBgl              | $\beta$ -glucosidase                       | <i>Hypocrea jecorina</i>                         | G0RIF5         | 6KHT                                                                                                                                                    |
| HjeBgl2             | $\beta$ -glucosidase 2                     | <i>Hypocrea jecorina</i>                         | O93785         | 3AHY, 4GXP                                                                                                                                              |
| TreBgl              | $\beta$ -glucosidase 2                     | <i>Trifolium repens</i>                          | P26205         | 1CBG                                                                                                                                                    |
| <b>Unclassified</b> |                                            |                                                  |                |                                                                                                                                                         |
|                     | <b>Protein Name</b>                        | <b>Organism</b>                                  | <b>UniProt</b> | <b>PDB</b>                                                                                                                                              |
| unmicBgl            | $\beta$ -glucosidase                       | uncultured microorganism                         | A0A1E1FFN6     | 5XGZ, 7WDN,<br>7WDO, 7WDP,<br>7WDR, 7WDS,<br>7WDV                                                                                                       |
| unidBgl             | $\beta$ -glucosidase                       | unidentified                                     | A0A2I2LGB3     | 5WKA                                                                                                                                                    |



**Table S3.** Table S3. Crystal structures of ligand-bound Bgl.

| Name<br>(organism)                                     | PDB  | Complex                                                       | Ligand Name                                                       | Ligand<br>ID | Resolution<br>(Å) |
|--------------------------------------------------------|------|---------------------------------------------------------------|-------------------------------------------------------------------|--------------|-------------------|
| AtuBgl<br>( <i>Agrobacterium tumefaciens</i> )         | 6RJK | Native                                                        |                                                                   |              |                   |
|                                                        | 6RJM | Product glucose                                               | alpha-D-glucopyranose                                             | GLC          | 2.11              |
|                                                        | 6RJO | Substrate analog salicin                                      | 2-(hydroxymethyl)phenyl<br>beta-D-glucopyranoside                 | SA0          | 1.80              |
|                                                        | 6RK2 | Substrate SAG                                                 | 2-(alpha-L-<br>altropyranosyloxy)benzoic<br>acid                  | 6GR          | 2.09              |
| PpoBgl2<br>( <i>Bacillus polymyxa</i> )                | 2O9P | Native                                                        |                                                                   |              | 2.10              |
|                                                        | 2JIE | 2-F-glucose                                                   | 2-deoxy-2-fluoro-alpha-D-<br>glucopyranose                        | G2F          | 2.30              |
|                                                        | 2O9R | Thiocellobiose                                                | thio-beta-cellobiose                                              |              | 2.30              |
|                                                        | 2O9T | Glucose                                                       | beta-D-glucopyranose                                              | BGC          | 2.15              |
| TmaBgl<br>( <i>Thermotoga maritima</i> )               | 1OD0 | Native                                                        |                                                                   |              | 1.9               |
|                                                        | 1OIF | 5-hydroxymethyl-3,4-<br>dihydropiperidin                      | 5-hydroxymethyl-3,4-<br>dihydropiperidin                          | IFM          | 2.12              |
|                                                        | 1OIM | 1-deoxynojirimycin                                            | 1-deoxynojirimycin                                                | NOJ          | 2.15              |
|                                                        | 1OIN | 2-deoxy-2-fluoro-alpha-D-<br>glucopyranose                    | 2-deoxy-2-fluoro-alpha-D-<br>glucopyranose                        | G2F          | 2.15              |
| OsaBgl<br>( <i>Oryza sativa</i><br>Japonica<br>Group)  | 3GNO | Native                                                        |                                                                   |              | 1.83              |
|                                                        | 3GNP | Octyl-beta-D-thio-<br>glucoside                               | octyl 1-thio-beta-D-<br>glucopyranoside                           | SOG          | 1.80              |
|                                                        | 3GNR | 2-deoxy-2-fluoroglucoside                                     | 2-deoxy-2-fluoro-alpha-D-<br>glucopyranose                        | G2F          | 1.81              |
| OsaBgl2<br>( <i>Oryza sativa</i> )                     | 3PTK | Native                                                        |                                                                   |              | 2.49              |
|                                                        | 3PTM | 2-fluoroglucopyranoside                                       | 2-deoxy-2-fluoro-alpha-D-<br>glucopyranose                        | G2F          | 2.40              |
|                                                        | 3PTQ | Dinitrophenyl 2-deoxy-2-<br>fluoro-beta-D-<br>glucopyranoside | 2,4-dinitrophenyl 2-deoxy-<br>2-fluoro-beta-D-<br>glucopyranoside | NFG          | 2.45              |
| OsaBgl3<br>( <i>Oryza sativa</i><br>Japonica<br>Group) | 7D6A | Native                                                        |                                                                   |              | 1.70              |
|                                                        | 7D6B | Delta-gluconolactone                                          | D-glucono-1,5-lactone                                             | LGC          | 2.10              |
| OsaBgl4<br>( <i>Oryza sativa</i><br>Japonica<br>Group) | 2RGL | Native                                                        |                                                                   |              | 2.20              |
|                                                        | 2RGM | 2-deoxy-2-fluoro-alpha-D-<br>glucopyranose                    | 2-deoxy-2-fluoro-alpha-D-<br>glucopyranose                        | G2F          | 1.55              |
| PchBgl<br>( <i>Phanerodontia chrysosporium</i> )       | 2E3Z | Native                                                        |                                                                   |              | 1.50              |
|                                                        | 2E40 | Gluconolactone                                                | D-glucono-1,5-lactone                                             | LGC          | 1.90              |

## References

1. Sievers, F.; Wilm, A.; Dineen, D.; Gibson, T.J.; Karplus, K.; Li, W.; Lopez, R.; McWilliam, H.; Remmert, M.; Soding, J.; et al. Fast, scalable generation of high-quality protein multiple sequence alignments using Clustal Omega. *Mol. Syst. Biol.* **2011**, *7*, 539, doi:10.1038/msb.2011.75.
2. Letunic, I.; Bork, P. Interactive Tree Of Life (iTOL) v5: an online tool for phylogenetic tree display and annotation. *Nucleic Acids Res.* **2021**, *49*, W293-W296, doi:10.1093/nar/gkab301.
